# Supplementary material for: Combined analysis reveals a core set of cycling genes
Source: Springer Nature journal article supplement (doi:10.1186/gb-2007-8-7-r146), 2007-07-24
Supplement: Additional file 2 [file gb-2007-8-7-r146-s2.pdf]

## **Supporting tables for:**

### **Combined analysis reveals a core set of cycling genes**

Yong Lu, Shaun Mahony, Panayiotis V. Benos, Roni Rosenfeld, Itamar Simon, Linda L. Breeden, Ziv Bar-Joseph

| <b>Tables</b>                                                                            | <b>Pages</b> |
|------------------------------------------------------------------------------------------|--------------|
| <b>Supporting tables 1-3: Overlap between our lists and previous cycling genes lists</b> | <b>2-3</b>   |
| <b>Supporting tables 4-10: Genes in the CCC4 and CCC3 sets</b>                           | <b>4-23</b>  |
| <b>Supporting table 11: Motif scan analysis</b>                                          | <b>24</b>    |
| <b>Supporting table 12: Enriched budding yeast complexes</b>                             | <b>25-26</b> |
| <b>Supporting tables 13-21: GO analysis of conserved and full lists</b>                  | <b>27-35</b> |

**Supporting Table 1: Overlap between identified cycling genes and previously published lists**

| Species       | Reference               | Genes in the list | Number in Overlap | Percent Overlap |
|---------------|-------------------------|-------------------|-------------------|-----------------|
| Budding Yeast | Spellman <i>et al.</i>  | 790               | 590               | 74.7            |
| Budding Yeast | Pramila <i>et al.</i>   | 769               | 533               | 69.3            |
| Fission Yeast | Rustici <i>et al.</i>   | 400               | 268               | 67              |
| Fission Yeast | Oliva <i>et al.</i>     | 709               | 315               | 52.5            |
| Fission Yeast | Peng <i>et al.</i>      | 740               | 310               | 51.7            |
| Humans        | Whitfield <i>et al.</i> | 778               | 376               | 48.3            |
| Arabidopsis   | Menges <i>et al.</i>    | 459               | 170               | 37              |

Supporting Table 1: Overlap between our lists and the published lists. We note that the overlap is not significantly different when from the overlap between the three previously published lists for fission yeast [5]. For each species, we count the number of genes common to our list and the published list(s). Percent of overlap is calculated with respect to the shorter list.

**Supporting Table 2: Overlap between CCC4 sets and previously published lists of cycling genes**

| Species       | Reference               | Genes in the set | Number in Overlap | Percent Overlap |
|---------------|-------------------------|------------------|-------------------|-----------------|
| Budding Yeast | Spellman <i>et al.</i>  | 37               | 33                | 89.2            |
| Budding Yeast | Pramila <i>et al.</i>   | 37               | 35                | 94.6            |
| Fission Yeast | Rustici <i>et al.</i>   | 39               | 21                | 53.8            |
| Fission Yeast | Oliva <i>et al.</i>     | 39               | 23                | 59              |
| Fission Yeast | Peng <i>et al.</i>      | 39               | 23                | 59              |
| Humans        | Whitfield <i>et al.</i> | 52               | 33                | 63.5            |
| Arabidopsis   | Menges <i>et al.</i>    | 39               | 25                | 64.1            |

Supporting Table 2: Overlap analysis of the CCC4 set and the published lists. For each species, we count the number of genes common to the CCC4 set and the published list(s). Percent of overlap is calculated with respect to the CCC4 set.

**Supporting Table 3: Overlap between CCC3 sets and previously published lists of cycling genes**

| Species       | Reference               | Genes in the list | Number in Overlap | Percent Overlap |
|---------------|-------------------------|-------------------|-------------------|-----------------|
| Budding Yeast | Spellman <i>et al.</i>  | 72                | 59                | 81.9            |
| Budding Yeast | Pramila <i>et al.</i>   | 72                | 64                | 88.9            |
| Fission Yeast | Rustici <i>et al.</i>   | 68                | 38                | 55.9            |
| Fission Yeast | Oliva <i>et al.</i>     | 68                | 42                | 61.8            |
| Fission Yeast | Peng <i>et al.</i>      | 68                | 44                | 64.7            |
| Humans        | Whitfield <i>et al.</i> | 83                | 47                | 56.6            |

Supporting Table 3: Overlap analysis of the CCC3 set and the published lists. For each species, we count the number of genes common to the CCC3 set and the published list(s). Percent of overlap is calculated with respect to the CCC3 set.

**Supporting Table 4: Budding yeast genes in the CCC4 set.**

| ORF     | Symbol | Aliases    | Description                                                                                                                                                                                                                                            |
|---------|--------|------------|--------------------------------------------------------------------------------------------------------------------------------------------------------------------------------------------------------------------------------------------------------|
| YFL039C | ACT1   | ABY1 END7  | Actin, structural protein involved in cell polarization, endocytosis, and other cytoskeletal functions                                                                                                                                                 |
| YNR044W | AGA1   |            | Anchorage subunit of a-agglutinin of a-cells, highly O-glycosylated protein with N-terminal secretion signal and C-terminal signal for addition of GPI anchor to cell wall, linked to adhesion subunit Aga2p via two disulfide bonds                   |
| YPR034W | ARP7   | SWP61      | Actin-related protein involved in transcriptional regulation; subunit of the chromatin remodeling Snf/Swi complex                                                                                                                                      |
| YGL116W | CDC20  | PAC5       | Cell-cycle regulated activator of anaphase-promoting complex/cyclosome (APC/C), which is required for metaphase/anaphase transition; directs ubiquitination of mitotic cyclins, Pds1p, and other anaphase inhibitors; potential Cdc28p substrate       |
| YLR274W | CDC46  | BOB1 MCM5  | Component of the hexameric MCM complex, which is important for priming origins of DNA replication in G1 and becomes an active ATP-dependent helicase that promotes DNA melting and elongation when activated by Cdc7p-Dbf4p in S-phase                 |
| YBR202W | CDC47  | MCM7       | Component of the hexameric MCM complex, which is important for priming origins of DNA replication in G1 and becomes an active ATP-dependent helicase that promotes DNA melting and elongation when activated by Cdc7p-Dbf4p in S-phase                 |
| YPR019W | CDC54  | HCD21 MCM4 | Essential helicase component of heterohexameric MCM2-7 complexes which bind pre-replication complexes on DNA and melt the DNA prior to replication; accumulates in the nucleus in G1; homolog of <i>S. pombe</i> Cdc21p                                |
| YJL194W | CDC6   |            | Essential ATP-binding protein required for DNA replication, component of the pre-replicative complex (pre-RC) which requires ORC to associate with chromatin and is in turn required for Mcm2-7p DNA association; homologous to <i>S. pombe</i> Cdc18p |
| YEL061C | CIN8   | KSL2 SDS15 | Kinesin motor protein involved in mitotic spindle assembly and chromosome segregation                                                                                                                                                                  |
| YGR108W | CLB1   | SCB1       | B-type cyclin involved in cell cycle progression; activates Cdc28p to promote the transition from G2 to M phase; accumulates during G2 and M, then targeted via a destruction box motif for ubiquitin-mediated degradation by the proteasome           |
| YPR119W | CLB2   |            | B-type cyclin involved in cell cycle progression; activates Cdc28p to promote the transition from G2 to M phase; accumulates during G2 and M, then targeted via a destruction box motif for ubiquitin-mediated degradation by the proteasome           |
| YLR210W | CLB4   |            | B-type cyclin involved in cell cycle progression; activates Cdc28p to promote the G2/M transition; may be involved in DNA replication and spindle assembly; accumulates during S phase and G2, then targeted for ubiquitin-mediated degradation        |
| YPR120C | CLB5   |            | B-type cyclin involved in DNA replication during S phase; activates Cdc28p to promote initiation of DNA synthesis;                                                                                                                                     |

|         |      |            |                                                                                                                                                                                                                                             |
|---------|------|------------|---------------------------------------------------------------------------------------------------------------------------------------------------------------------------------------------------------------------------------------------|
|         |      |            | functions in formation of mitotic spindles along with Clb3p and Clb4p; most abundant during late G1 phase                                                                                                                                   |
| YGR109C | CLB6 |            | B-type cyclin involved in DNA replication during S phase; activates Cdc28p to promote initiation of DNA synthesis; functions in formation of mitotic spindles along with Clb3p and Clb4p; most abundant during late G1                      |
| YKL049C | CSE4 | CSL2       | Centromere protein that resembles histones, required for proper kinetochore function; homolog of human CENP-A                                                                                                                               |
| YCR089W | FIG2 |            | Cell wall adhesin, expressed specifically during mating; may be involved in maintenance of cell wall integrity during mating                                                                                                                |
| YBR010W | HHT1 | BUR5 SIN2  | One of two identical histone H3 proteins (see also HHT2); core histone required for chromatin assembly, involved in heterochromatin-mediated telomeric and HM silencing; regulated by acetylation, methylation, and mitotic phosphorylation |
| YNL031C | HHT2 |            | One of two identical histone H3 proteins (see also HHT1); core histone required for chromatin assembly, involved in heterochromatin-mediated telomeric and HM silencing; regulated by acetylation, methylation, and mitotic phosphorylation |
| YDR225W | HTA1 | H2A1 SPT11 | One of two nearly identical (see also HTA2) histone H2A subtypes; core histone required for chromatin assembly and chromosome function; DNA damage-dependent phosphorylation by Mec1p facilitates DNA repair; acetylated by Nat4p           |
| YBL003C | HTA2 | H2A2       | One of two nearly identical (see also HTA1) histone H2A subtypes; core histone required for chromatin assembly and chromosome function; DNA damage-dependent phosphorylation by Mec1p facilitates DNA repair; acetylated by Nat4p           |
| YOL012C | HTZ1 | HTA3       | Histone variant H2AZ, exchanged for histone H2A in nucleosomes by the SWR1 complex; involved in transcriptional regulation through prevention of the spread of silent heterochromatin                                                       |
| YPR141C | KAR3 | OSR11      | Minus-end-directed microtubule motor that functions in mitosis and meiosis, localizes to the spindle pole body and localization is dependent on functional Cik1p, required for nuclear fusion during mating; potential Cdc28p substrate     |
| YBL063W | KIP1 | CIN9       | Kinesin-related motor protein required for mitotic spindle assembly and chromosome segregation; functionally redundant with Cin8p                                                                                                           |
| YBL023C | MCM2 |            | Protein involved in DNA replication; component of the Mcm2-7 hexameric complex that binds chromatin as a part of the pre-replicative complex                                                                                                |
| YEL032W | MCM3 |            | Protein involved in DNA replication; component of the Mcm2-7 hexameric complex that binds chromatin as a part of the pre-replicative complex                                                                                                |
| YGL201C | MCM6 |            | Protein involved in DNA replication; component of the Mcm2-7 hexameric complex that binds chromatin as a part of the pre-replicative complex                                                                                                |
| YIL106W | MOB1 |            | Component of the mitotic exit network; associates with and is required for the activation and Cdc15p-dependent phosphorylation of the Dbf2p kinase; required for cytokinesis and cell separation; component of the CCR4                     |

|         |      |                                                              |                                                                                                                                                                                                                                                |
|---------|------|--------------------------------------------------------------|------------------------------------------------------------------------------------------------------------------------------------------------------------------------------------------------------------------------------------------------|
|         |      |                                                              | transcriptional complex                                                                                                                                                                                                                        |
| YHR086W | NAM8 | MRE2 MUD15                                                   | RNA binding protein, component of the U1 snRNP protein; mutants are defective in meiotic recombination and in formation of viable spores, involved in the formation of DSBs through meiosis-specific splicing of MER2 pre-mRNA                 |
| YDR150W | NUM1 | PAC12                                                        | Protein required for nuclear migration, localizes to the mother cell cortex and the bud tip; may mediate interactions of dynein and cytoplasmic microtubules with the cell cortex                                                              |
| YML065W | ORC1 |                                                              | Largest subunit of the origin recognition complex, which directs DNA replication by binding to replication origins and is also involved in transcriptional silencing; may be phosphorylated by Cdc28p                                          |
| YOR127W | RGA1 | DBM1 THE1                                                    | GTPase-activating protein for the polarity-establishment protein Cdc42p; implicated in control of septin organization, pheromone response, and haploid invasive growth                                                                         |
| YDR077W | SED1 |                                                              | Major stress-induced structural GPI-cell wall glycoprotein in stationary-phase cells, associates with translating ribosomes, possible role in mitochondrial genome maintenance; ORF contains two distinct variable minisatellites              |
| YJL074C | SMC3 |                                                              | Subunit of the multiprotein cohesin complex required for sister chromatid cohesion in mitotic cells; also required, with Rec8p, for cohesion and recombination during meiosis; phylogenetically conserved SMC chromosomal ATPase family member |
| YLR045C | STU2 |                                                              | Microtubule-associated protein (MAP) of the XMAP215/Dis1 family; regulates microtubule dynamics during spindle orientation and metaphase chromosome alignment; interacts with spindle pole body component Spc72p                               |
| YFL037W | TUB2 | ARM10 SHE8                                                   | Beta-tubulin; associates with alpha-tubulin (Tub1p and Tub3p) to form tubulin dimer, which polymerizes to form microtubules                                                                                                                    |
| YLR212C | TUB4 |                                                              | Gamma-tubulin, involved in nucleating microtubules from both the cytoplasmic and nuclear faces of the spindle pole body                                                                                                                        |
| YCR084C | TUP1 | AAR1 AER2 <br>AMM1 CRT4 <br>CYC9 FLK1 <br>ROX4 SFL2 <br>UMR7 | General repressor of transcription, forms complex with Cyc8p, involved in the establishment of repressive chromatin structure through interactions with histones H3 and H4, appears to enhance expression of some genes                        |

**Supporting Table 5: Fission yeast genes in the CCC4 set.**

| <b>Name</b>  | <b>Description</b>                          |
|--------------|---------------------------------------------|
| act1         | actin                                       |
| alp14        | Mad2-dependent spindle checkpoint component |
| arp3         | actin-like protein                          |
| cdc13        | cyclin                                      |
| cdc18        | MCM loader                                  |
| cdc21        | MCM complex subunit Cdc21                   |
| cig1         | cyclin                                      |
| cig2         | cyclin                                      |
| cnp1         | CENP-A                                      |
| csx1         | RNA-binding protein Csx1                    |
| cut7         | kinesin-like protein Cut7                   |
| dis1         | microtubule-associated protein Dis1         |
| h3.3         | histone H3                                  |
| hht1         | histone H3                                  |
| hht2         | histone H3                                  |
| hta1         | histone H2A                                 |
| hta2         | histone H2A                                 |
| klp2         | kinesin-like protein Klp2                   |
| klp3         | kinesin-like protein Klp3                   |
| klp8         | kinesin-like protein Klp8                   |
| mcm3         | MCM complex subunit Mcm3                    |
| mcm5         | MCM complex subunit Mcm5                    |
| mcm6         | MCM complex subunit Mcm6                    |
| mob1         | protein kinase regulator Mob1               |
| nda2         | tubulin alpha 1                             |
| nda3         | tubulin beta                                |
| pht1         | histone H2A variant                         |
| prp5         | WD repeat protein Prp5                      |
| psm3         | mitotic cohesin complex subunit Psm3        |
| rga2         | GTPase activating protein                   |
| slp1         | sleepy homolog Slp1                         |
| SPAC2E1P5.05 | U3 snoRNP-associated protein                |
| SPBC15D4.01c | kinesin-like protein                        |
| SPBC23E6.01c | RNA-binding protein                         |
| SPBC4F6.13c  | WD repeat protein                           |
| SPBPJ4664.02 | glycoprotein                                |
| SPCC18.05c   | notchless-like protein                      |

|             |                             |
|-------------|-----------------------------|
| SPCC970.10c | ubiquitin-protein ligase E3 |
| srw1        | CDK inhibitor Srw1          |

**Supporting Table 6: Human genes in the CCC4 set.**

| <b>Name</b> | <b>Description</b>                                                            |
|-------------|-------------------------------------------------------------------------------|
| ACTA2       | ACTA2, ACTSA, ACTVS: Actin, aortic smooth muscle                              |
| ACTR1A      | ACTR1A, CTRN1: Alpha-centractin                                               |
| ACTR2       |                                                                               |
| ACTR6       | ACTR6, CDA12: Actin-related protein 6                                         |
| ANKRD17     | KIAA0697, ANKRD17: KIAA0697 protein (Fragment)                                |
| CCNA2       | CCNA2, CCN1, CCNA: Cyclin-A2                                                  |
| CCNB1       | Cyclin B1                                                                     |
| CCNE1       | CCNE1, CCNE: G1/S-specific cyclin-E1                                          |
| CCNF        | CCNF: G2/mitotic-specific cyclin-F                                            |
| CDC20       | CDC20: Cell division cycle protein 20 homolog                                 |
| CDC6        | CDC6, CDC18L: Cell division control protein 6 homolog                         |
| CENPE       | CENPE variant protein: CENPE variant protein (Fragment)                       |
| CENPF       | CENPF: Centromere protein F                                                   |
| CKAP5       | CKAP5: CKAP5 protein (Fragment)                                               |
| CSPG6       | CSPG6, BAM, BMH, SMC3, SMC3L1: Structural maintenance of chromosome 3         |
| ELAVL2      | ELAVL2, RP11-315I14.4-004: ELAV                                               |
| FZR1        | FZR1, CDH1, FYR, FZR, KIAA1242: Fizzy-related protein homolog                 |
| GRLF1       | GRLF1, GRF1, KIAA1722: Glucocorticoid receptor DNA-binding factor 1           |
| H3F3A       | NA                                                                            |
| HIST1H2AC   | HIST1H2AC, H2AFL: Histone H2A type 1-C                                        |
| HIST2H2AA   | HIST2H2AA3, H2AFO, HIST2H2AA: Histone H2A type 2-A                            |
| KIF11       | KIF11, EG5, KNSL1: Kinesin-like protein KIF11                                 |
| KIF14       | KIF14, KIAA0042: Kinesin-like protein KIF14                                   |
| KIF1A       | KIF1A, ATSV: Kinesin-like protein KIF1A                                       |
| KIF1B       | KIF1B, KIAA0591, KIAA1448: Kinesin-like protein KIF1B                         |
| KIF22       | KIF22, KID, KNSL4: Kinesin-like protein KIF22                                 |
| KIF23       | KIF23: KIF23 protein (Fragment)                                               |
| KIF2C       | KIF2C, KNSL6: Kinesin-like protein KIF2C                                      |
| KIF5A       | KIF5A, NKHC1: Kinesin heavy chain isoform 5A                                  |
| KIF5B       |                                                                               |
| KIF9        | KIF9: Kinesin-like protein KIF9                                               |
| KIFC1       | KIFC1, HSET, KNSL2: Kinesin-like protein KIFC1                                |
| KIFC3       | KIFC3: Kinesin-like protein KIFC3                                             |
| MCM2        | MCM2, BM28, CDCL1, KIAA0030: DNA replication licensing factor MCM2            |
| MCM3        | MCM3, RP1-108C2.3-004: MCM3 minichromosome maintenance deficient 3 (Fragment) |
| MCM4        | MCM4, CDC21: DNA replication licensing factor MCM4                            |

|         |                                                                            |
|---------|----------------------------------------------------------------------------|
| MCM5    | Minichromosome maintenance deficient protein 5 variant (Fragment)          |
| MCM6    | MCM6: DNA replication licensing factor MCM6                                |
| MCM8    | MCM8, C20orf154: DNA replication licensing factor MCM8                     |
| MDC1    | MDC1, KIAA0170, NFB1: Mediator of DNA damage checkpoint protein 1          |
| MOBK2C  | MOBK2C, RP11-49P4.4-002: MOB1, Mps One Binder kinase activator-like 2C     |
| ORC1L   | ORC1L, ORC1, PARC1: Origin recognition complex subunit 1                   |
| RNPC3   | RNP, RNPC3, RP5-1108M17.6-002: CDNA FLJ25070 fis, clone CBL05164           |
| RNU3IP2 | RNU3IP2, U355K: U3 small nucleolar RNA-interacting protein 2               |
| SMC4L1  | SMC4L1, CAPC, SMC4: Structural maintenance of chromosomes 4-like 1 protein |
| TLE3    | TLE3, KIAA1547: Transducin-like enhancer protein 3                         |
| TUBA1   |                                                                            |
| TUBA2   | TUBA2: Tubulin alpha-2 chain                                               |
| TUBA3   | TUBA3: Tubulin alpha-3 chain                                               |
| TUBG1   | TUBG1, TUBG: Tubulin gamma-1 chain                                         |
| WDTC1   | RP11-4K3__A.1, RP11-4K3__A.1-003: Novel protein                            |
| WSB1    | WSB1, SWIP1: WD repeat and SOCS box-containing protein 1                   |

**Supporting Table 7: *Arabidopsis* genes in the CCC4 set.**

| <b>Name</b> | <b>Description</b>                                                                             |
|-------------|------------------------------------------------------------------------------------------------|
| ACT1        | ACT1 (ACTIN 1); structural constituent of cytoskeleton                                         |
| ACT11       | Actin-11                                                                                       |
| ACT7        | Actin-7                                                                                        |
| At1g09200   | DNA binding                                                                                    |
| At2g07690   | Minichromosome maintenance family protein                                                      |
| At2g17620   | Cyclin                                                                                         |
| At2g21300   | Kinesin motor family protein                                                                   |
| At2g22610   | Kinesin motor protein-related                                                                  |
| At2g28620   | Kinesin motor protein-related                                                                  |
| At2g35410   | 33 kDa ribonucleoprotein                                                                       |
| At2g36200   | Probable 125 kDa kinesin-related protein                                                       |
| At2g37420   | Kinesin motor protein-related                                                                  |
| At2g47500   | Putative kinesin                                                                               |
| At3g54560   | Histone H2A variant 1                                                                          |
| At3g54870   | Kinesin-like protein                                                                           |
| At4g03100   | Rac GTPase activator                                                                           |
| At4g14330   | Kinesin like protein                                                                           |
| At4g19050   | Mob1/phocein family protein                                                                    |
| At4g35110   | NA                                                                                             |
| At4g35620   | Cyclin 2b (CYC2b)                                                                              |
| At4g39050   | Kinesin-related protein (MKRP2), kinesin motor protein - <i>Ustilago maydis</i> , PID:g2062750 |
| At5g26900   | WD-40 repeat family protein                                                                    |
| ATK3        | Kinesin-3                                                                                      |
| CDC20.2     | WD-40 repeat family protein                                                                    |
| CDC6        | Cell division control protein CDC6                                                             |
| CYC1BAT     | Cyclin 1b (CYC1b)                                                                              |
| CYCA1;2     | Mitotic cyclin a2-type, putative                                                               |
| CYCA2;1     | Cyclin 3a                                                                                      |
| CYCB1;4     | Cyclin                                                                                         |
| CYCB3;1     | Cyclin family protein                                                                          |
| CYCD1;1     | Cyclin delta-1                                                                                 |
| CYCD4;1     | Cyclin                                                                                         |
| MOR1        | Microtubule organization 1 protein (MOR1)                                                      |
| PAKRP1      | Phragmoplast-associated kinesin-related protein (PAKRP1)                                       |
| PEARLI4     | PEARLI4                                                                                        |
| SPA1        | Phytochrome A supressor spa1 (SPA1)                                                            |
| TTN7        | Similar to SMC2-like condensin                                                                 |

|      |                      |
|------|----------------------|
| TUB5 | Tubulin beta-5 chain |
| TUB6 | Tubulin beta-6 chain |

**Supporting Table 8: Budding yeast genes in the CCC3 set.**

| ORF     | Symbol | Aliases    | Description                                                                                                                                                                                                                                            |
|---------|--------|------------|--------------------------------------------------------------------------------------------------------------------------------------------------------------------------------------------------------------------------------------------------------|
| YLR131C | ACE2   |            | Transcription factor that activates expression of early G1-specific genes, localizes to daughter cell nuclei after cytokinesis and delays G1 progression in daughters, localization is regulated by phosphorylation; potential Cdc28p substrate        |
| YFL039C | ACT1   | ABY1 END7  | Actin, structural protein involved in cell polarization, endocytosis, and other cytoskeletal functions                                                                                                                                                 |
| YNR044W | AGA1   |            | Anchorage subunit of a-agglutinin of a-cells, highly O-glycosylated protein with N-terminal secretion signal and C-terminal signal for addition of GPI anchor to cell wall, linked to adhesion subunit Aga2p via two disulfide bonds                   |
| YPR034W | ARP7   | SWP61      | Actin-related protein involved in transcriptional regulation; subunit of the chromatin remodeling Snf/Swi complex                                                                                                                                      |
| YOR058C | ASE1   | YOR29-09   | Member of a family of microtubule-associated proteins (MAPs) that function at the mitotic spindle midzone; required for spindle elongation; undergoes cell cycle-regulated degradation by anaphase promoting complex; potential Cdc28p substrate       |
| YGL116W | CDC20  | PAC5       | Cell-cycle regulated activator of anaphase-promoting complex/cyclosome (APC/C), which is required for metaphase/anaphase transition; directs ubiquitination of mitotic cyclins, Pds1p, and other anaphase inhibitors; potential Cdc28p substrate       |
| YLR274W | CDC46  | BOB1 MCM5  | Component of the hexameric MCM complex, which is important for priming origins of DNA replication in G1 and becomes an active ATP-dependent helicase that promotes DNA melting and elongation when activated by Cdc7p-Dbf4p in S-phase                 |
| YBR202W | CDC47  | MCM7       | Component of the hexameric MCM complex, which is important for priming origins of DNA replication in G1 and becomes an active ATP-dependent helicase that promotes DNA melting and elongation when activated by Cdc7p-Dbf4p in S-phase                 |
| YPR019W | CDC54  | HCD21 MCM4 | Essential helicase component of heterohexameric MCM2-7 complexes which bind pre-replication complexes on DNA and melt the DNA prior to replication; accumulates in the nucleus in G1; homolog of <i>S. pombe</i> Cdc21p                                |
| YJL194W | CDC6   |            | Essential ATP-binding protein required for DNA replication, component of the pre-replicative complex (pre-RC) which requires ORC to associate with chromatin and is in turn required for Mcm2-7p DNA association; homologous to <i>S. pombe</i> Cdc18p |
| YEL061C | CIN8   | KSL2 SDS15 | Kinesin motor protein involved in mitotic spindle assembly and chromosome segregation                                                                                                                                                                  |
| YGR108W | CLB1   | SCB1       | B-type cyclin involved in cell cycle progression; activates Cdc28p to promote the transition from G2 to M phase; accumulates during G2 and M, then targeted via a destruction box motif for ubiquitin-mediated degradation by the proteasome           |
| YPR119W | CLB2   |            | B-type cyclin involved in cell cycle progression; activates Cdc28p to promote the transition from G2 to M phase;                                                                                                                                       |

|         |      |           |                                                                                                                                                                                                                                                 |
|---------|------|-----------|-------------------------------------------------------------------------------------------------------------------------------------------------------------------------------------------------------------------------------------------------|
|         |      |           | accumulates during G2 and M, then targeted via a destruction box motif for ubiquitin-mediated degradation by the proteasome                                                                                                                     |
| YLR210W | CLB4 |           | B-type cyclin involved in cell cycle progression; activates Cdc28p to promote the G2/M transition; may be involved in DNA replication and spindle assembly; accumulates during S phase and G2, then targeted for ubiquitin-mediated degradation |
| YPR120C | CLB5 |           | B-type cyclin involved in DNA replication during S phase; activates Cdc28p to promote initiation of DNA synthesis; functions in formation of mitotic spindles along with Clb3p and Clb4p; most abundant during late G1 phase                    |
| YGR109C | CLB6 |           | B-type cyclin involved in DNA replication during S phase; activates Cdc28p to promote initiation of DNA synthesis; functions in formation of mitotic spindles along with Clb3p and Clb4p; most abundant during late G1                          |
| YKL049C | CSE4 | CSL2      | Centromere protein that resembles histones, required for proper kinetochore function; homolog of human CENP-A                                                                                                                                   |
| YPR104C | FHL1 |           | Putative transcriptional regulator with similarity to DNA-binding domain of Drosophila forkhead; required for rRNA processing                                                                                                                   |
| YCR089W | FIG2 |           | Cell wall adhesin, expressed specifically during mating; may be involved in maintenance of cell wall integrity during mating                                                                                                                    |
| YIL131C | FKH1 |           | Transcription factor of the forkhead family that regulates the cell cycle and pseudohyphal growth; also involved in chromatin silencing at HML and HMR                                                                                          |
| YNL068C | FKH2 |           | Transcription factor of the forkhead family that regulates the cell cycle and pseudohyphal growth; also involved in chromatin silencing at HML and HMR; potential Cdc28p substrate                                                              |
| YCR065W | HCM1 |           | Forkhead transcription factor involved in cell cycle specific transcription of SPC110; dosage-dependent suppressor of calmodulin mutants with specific defects in SPB assembly; involved in telomere maintenance                                |
| YBL032W | HEK2 | KHD1      | RNA binding protein with similarity to hnRNP-K that localizes to the cytoplasm and to subtelomeric DNA; required for the proper localization of ASH1 mRNA; involved in the regulation of telomere position effect and telomere length           |
| YBR009C | HHF1 |           | One of two identical histone H4 proteins (see also HHF2); core histone required for chromatin assembly and chromosome function; contributes to telomeric silencing; N-terminal domain involved in maintaining genomic integrity                 |
| YNL030W | HHF2 |           | One of two identical histone H4 proteins (see also HHF1); core histone required for chromatin assembly and chromosome function; contributes to telomeric silencing; N-terminal domain involved in maintaining genomic integrity                 |
| YBR010W | HHT1 | BUR5 SIN2 | One of two identical histone H3 proteins (see also HHT2); core histone required for chromatin assembly, involved in heterochromatin-mediated telomeric and HM silencing; regulated by acetylation, methylation, and mitotic phosphorylation     |

|         |      |            |                                                                                                                                                                                                                                               |
|---------|------|------------|-----------------------------------------------------------------------------------------------------------------------------------------------------------------------------------------------------------------------------------------------|
| YNL031C | HHT2 |            | One of two identical histone H3 proteins (see also HHT1); core histone required for chromatin assembly, involved in heterochromatin-mediated telomeric and HM silencing; regulated by acetylation, methylation, and mitotic phosphorylation   |
| YMR032W | HOF1 | CYK2       | Bud neck-localized, SH3 domain-containing protein required for cytokinesis; regulates actomyosin ring dynamics and septin localization; interacts with the formins, Bni1p and Bnr1p, and with Cyk3p, Vrp1p, and Bni5p                         |
| YDR225W | HTA1 | H2A1 SPT11 | One of two nearly identical (see also HTA2) histone H2A subtypes; core histone required for chromatin assembly and chromosome function; DNA damage-dependent phosphorylation by Mec1p facilitates DNA repair; acetylated by Nat4p             |
| YBL003C | HTA2 | H2A2       | One of two nearly identical (see also HTA1) histone H2A subtypes; core histone required for chromatin assembly and chromosome function; DNA damage-dependent phosphorylation by Mec1p facilitates DNA repair; acetylated by Nat4p             |
| YDR224C | HTB1 | SPT12      | One of two nearly identical (see HTB2) histone H2B subtypes required for chromatin assembly and chromosome function; Rad6p-Bre1p-Lge1p mediated ubiquitination regulates transcriptional activation, meiotic DSB formation and H3 methylation |
| YBL002W | HTB2 |            | One of two nearly identical (see HTB1) histone H2B subtypes required for chromatin assembly and chromosome function; Rad6p-Bre1p-Lge1p mediated ubiquitination regulates transcriptional activation, meiotic DSB formation and H3 methylation |
| YOL012C | HTZ1 | HTA3       | Histone variant H2AZ, exchanged for histone H2A in nucleosomes by the SWR1 complex; involved in transcriptional regulation through prevention of the spread of silent heterochromatin                                                         |
| YPL242C | IQG1 | CYK1       | Essential protein required for determination of budding pattern, promotes localization of axial markers Bud4p and Cdc12p and functionally interacts with Sec3p, localizes to the contractile ring during anaphase, member of the IQGAP family |
| YPR141C | KAR3 | OSR11      | Minus-end-directed microtubule motor that functions in mitosis and meiosis, localizes to the spindle pole body and localization is dependent on functional Cik1p, required for nuclear fusion during mating; potential Cdc28p substrate       |
| YGR238C | KEL2 |            | Protein that functions in a complex with Kel1p to negatively regulate mitotic exit, interacts with Tem1p and Lte1p; localizes to regions of polarized growth; potential Cdc28p substrate                                                      |
| YBL063W | KIP1 | CIN9       | Kinesin-related motor protein required for mitotic spindle assembly and chromosome segregation; functionally redundant with Cin8p                                                                                                             |
| YKL008C | LAC1 | DGT1       | Ceramide synthase component, involved in synthesis of ceramide from C26(acyl)-coenzyme A and dihydrosphingosine or phytosphingosine, functionally equivalent to Lag1p                                                                         |
| YBL023C | MCM2 |            | Protein involved in DNA replication; component of the                                                                                                                                                                                         |

|         |      |            |                                                                                                                                                                                                                                                 |
|---------|------|------------|-------------------------------------------------------------------------------------------------------------------------------------------------------------------------------------------------------------------------------------------------|
|         |      |            | Mcm2-7 hexameric complex that binds chromatin as a part of the pre-replicative complex                                                                                                                                                          |
| YEL032W | MCM3 |            | Protein involved in DNA replication; component of the Mcm2-7 hexameric complex that binds chromatin as a part of the pre-replicative complex                                                                                                    |
| YGL201C | MCM6 |            | Protein involved in DNA replication; component of the Mcm2-7 hexameric complex that binds chromatin as a part of the pre-replicative complex                                                                                                    |
| YIL106W | MOB1 |            | Component of the mitotic exit network; associates with and is required for the activation and Cdc15p-dependent phosphorylation of the Dbf2p kinase; required for cytokinesis and cell separation; component of the CCR4 transcriptional complex |
| YOL112W | MSB4 |            | GTPase-activating protein of the Ras superfamily that acts primarily on Sec4p, localizes to the bud site and bud tip, has similarity to Msb3p; msb3 msb4 double mutation causes defects in secretion and actin organization                     |
| YOL090W | MSH2 | PMS5       | Protein that forms heterodimers with Msh3p and Msh6p that bind to DNA mismatches to initiate the mismatch repair process; contains a Walker ATP-binding motif required for repair activity; Msh2p-Msh6p binds to and hydrolyzes ATP             |
| YDR097C | MSH6 | PMS3       | Protein required for mismatch repair in mitosis and meiosis, forms a complex with Msh2p to repair both single-base & insertion-deletion mispairs; potentially phosphorylated by Cdc28p                                                          |
| YPL247C | NA   | NA         | NA                                                                                                                                                                                                                                              |
| YHR086W | NAM8 | MRE2 MUD15 | RNA binding protein, component of the U1 snRNP protein; mutants are defective in meiotic recombination and in formation of viable spores, involved in the formation of DSBs through meiosis-specific splicing of MER2 pre-mRNA                  |
| YDR150W | NUM1 | PAC12      | Protein required for nuclear migration, localizes to the mother cell cortex and the bud tip; may mediate interactions of dynein and cytoplasmic microtubules with the cell cortex                                                               |
| YML065W | ORC1 |            | Largest subunit of the origin recognition complex, which directs DNA replication by binding to replication origins and is also involved in transcriptional silencing; may be phosphorylated by Cdc28p                                           |
| YBR233W | PBP2 | HEK1       | RNA binding protein with similarity to mammalian heterogeneous nuclear RNP K protein, involved in the regulation of telomere position effect and telomere length                                                                                |
| YMR076C | PDS5 |            | Protein required for establishment and maintenance of sister chromatid condensation and cohesion, colocalizes with cohesin on chromosomes in an interdependent manner, may function as a protein-protein interaction scaffold                   |
| YDR481C | PHO8 |            | Repressible alkaline phosphatase, a glycoprotein localized to the vacuole; regulated by levels of inorganic phosphate and by a system consisting of Pho4p, Pho9p, Pho80p, Pho81p and Pho85p; dephosphorylates phosphotyrosyl peptides           |
| YNL262W | POL2 | DUN2       | Catalytic subunit of DNA polymerase epsilon, one of the major chromosomal DNA replication polymerases                                                                                                                                           |

|         |       |                 |                                                                                                                                                                                                                                                |
|---------|-------|-----------------|------------------------------------------------------------------------------------------------------------------------------------------------------------------------------------------------------------------------------------------------|
|         |       |                 | characterized by processivity and proofreading exonuclease activity; also involved in DNA synthesis during DNA repair                                                                                                                          |
| YKL045W | PRI2  |                 | Subunit of DNA primase, which is required for DNA synthesis and double-strand break repair                                                                                                                                                     |
| YER095W | RAD51 | MUT5            | Strand exchange protein, forms a helical filament with DNA that searches for homology; involved in the recombinational repair of double-strand breaks in DNA during vegetative growth and meiosis; homolog of Dmc1p and bacterial RecA protein |
| YOR127W | RGA1  | DBM1 THE1       | GTPase-activating protein for the polarity-establishment protein Cdc42p; implicated in control of septin organization, pheromone response, and haploid invasive growth                                                                         |
| YPR165W | RHO1  |                 | GTP-binding protein of the rho subfamily of Ras-like proteins, involved in establishment of cell polarity; regulates protein kinase C (Pkc1p) and the cell wall synthesizing enzyme 1,3-beta-glucan synthase (Fks1p and Gsc2p)                 |
| YER070W | RNR1  | CRT7 RIR1 SDS12 | Ribonucleotide-diphosphate reductase (RNR), large subunit; the RNR complex catalyzes the rate-limiting step in dNTP synthesis and is regulated by DNA replication and DNA damage checkpoint pathways via localization of the small subunits    |
| YIL066C | RNR3  | DIN1 RIR3       | Ribonucleotide-diphosphate reductase (RNR), large subunit; the RNR complex catalyzes the rate-limiting step in dNTP synthesis and is regulated by DNA replication and DNA damage checkpoint pathways via localization of the small subunits    |
| YGR152C | RSR1  | BUD1            | GTP-binding protein of the ras superfamily required for bud site selection, morphological changes in response to mating pheromone, and efficient cell fusion; localized to the plasma membrane; significantly similar to mammalian Rap GTPases |
| YDR077W | SED1  |                 | Major stress-induced structural GPI-cell wall glycoprotein in stationary-phase cells, associates with translating ribosomes, possible role in mitochondrial genome maintenance; ORF contains two distinct variable minisatellites              |
| YJL074C | SMC3  |                 | Subunit of the multiprotein cohesin complex required for sister chromatid cohesion in mitotic cells; also required, with Rec8p, for cohesion and recombination during meiosis; phylogenetically conserved SMC chromosomal ATPase family member |
| YHR050W | SMF2  |                 | Divalent metal ion transporter involved in manganese homeostasis; has broad specificity for di-valent and tri-valent metals; post-translationally regulated by levels of metal ions; member of the Nramp family of metal transport proteins    |
| YLR034C | SMF3  |                 | Putative divalent metal ion transporter involved in iron homeostasis; transcriptionally regulated by metal ions; member of the Nramp family of metal transport proteins                                                                        |
| YLR045C | STU2  |                 | Microtubule-associated protein (MAP) of the XMAP215/Dis1 family; regulates microtubule dynamics during spindle orientation and metaphase chromosome                                                                                            |

|         |       |                                                           |                                                                                                                                                                                                                                   |
|---------|-------|-----------------------------------------------------------|-----------------------------------------------------------------------------------------------------------------------------------------------------------------------------------------------------------------------------------|
|         |       |                                                           | alignment; interacts with spindle pole body component Spc72p                                                                                                                                                                      |
| YJL187C | SWE1  | WEE1                                                      | Protein kinase that regulates the G2/M transition by inhibition of Cdc28p kinase activity; localizes to the nucleus and to the daughter side of the mother-bud neck; homolog of <i>S. pombe</i> Wee1p; potential Cdc28p substrate |
| YDR146C | SWI5  |                                                           | Transcription factor that activates transcription of genes expressed in G1 phase and at the G1/M boundary; localization to the nucleus occurs during G1 and appears to be regulated by phosphorylation by Cdc28p kinase           |
| YLR136C | TIS11 | CTH2                                                      | mRNA-binding protein expressed during iron starvation; binds to a sequence element in the 3'-untranslated regions of specific mRNAs to mediate their degradation; involved in iron homeostasis                                    |
| YFL037W | TUB2  | ARM10 SHE8                                                | Beta-tubulin; associates with alpha-tubulin (Tub1p and Tub3p) to form tubulin dimer, which polymerizes to form microtubules                                                                                                       |
| YLR212C | TUB4  |                                                           | Gamma-tubulin, involved in nucleating microtubules from both the cytoplasmic and nuclear faces of the spindle pole body                                                                                                           |
| YCR084C | TUP1  | AAR1 AER2 <br>AMM1 CRT4 <br>CYC9 FLK1 <br>ROX4 SFL2  UMR7 | General repressor of transcription, forms complex with Cyc8p, involved in the establishment of repressive chromatin structure through interactions with histones H3 and H4, appears to enhance expression of some genes           |
| YBL004W | UTP20 |                                                           | Component of the small-subunit (SSU) processome, which is involved in the biogenesis of the 18S rRNA                                                                                                                              |

**Supporting Table 9: Fission yeast genes in the CCC3 set.**

| <b>Name</b> | <b>Description</b>                              |
|-------------|-------------------------------------------------|
| ace2        | transcription factor Ace2                       |
| act1        | actin                                           |
| alp14       | Mad2-dependent spindle checkpoint component     |
| arp3        | actin-like protein                              |
| ase1        | microtubule-associated protein Ase1             |
| cdc13       | cyclin                                          |
| cdc15       | cell division control protein Cdc15             |
| cdc18       | MCM loader                                      |
| cdc20       | DNA polymerase epsilon catalytic subunit a Pol2 |
| cdc21       | MCM complex subunit Cdc21                       |
| cdc22       | ribonucleoside reductase large subunit Cdc22    |
| cdc42       | Rho family GTPase Cdc42                         |
| cig1        | cyclin                                          |
| cig2        | cyclin                                          |
| cnp1        | CENP-A                                          |
| csx1        | RNA-binding protein Csx1                        |
| cut7        | kinesin-like protein Cut7                       |
| dis1        | microtubule-associated protein Dis1             |
| fkh2        | fork head transcription factor Fkh2             |
| h3.3        | histone H3                                      |
| h4.3        | histone H4                                      |
| hhf1        | histone H4                                      |
| hhf2        | histone H4                                      |
| hht1        | histone H3                                      |
| hht2        | histone H3                                      |
| hta1        | histone H2A                                     |
| hta2        | histone H2A                                     |
| htb1        | histone H2B                                     |
| imp2        | FCH domain                                      |
| klp2        | kinesin-like protein Klp2                       |
| klp3        | kinesin-like protein Klp3                       |
| klp8        | kinesin-like protein Klp8                       |
| mcm3        | MCM complex subunit Mcm3                        |
| mcm5        | MCM complex subunit Mcm5                        |
| mcm6        | MCM complex subunit Mcm6                        |
| mik1        | mitotic inhibitor kinase Mik1                   |
| mob1        | protein kinase regulator Mob1                   |

|              |                                                               |
|--------------|---------------------------------------------------------------|
| msh6         | MutS protein homolog                                          |
| nda2         | tubulin alpha 1                                               |
| nda3         | tubulin beta                                                  |
| pds5         | cohesin-associated protein                                    |
| pht1         | histone H2A variant                                           |
| prp5         | WD repeat protein Prp5                                        |
| psm3         | mitotic cohesin complex subunit Psm3                          |
| rga2         | GTPase activating protein                                     |
| rho4         | Rho family GTPase Rho4                                        |
| rhp51        | recombinase Rhp51                                             |
| rnc1         | RNA-binding protein that suppresses calcineurin deletion Rnc1 |
| rng2         | IQGAP                                                         |
| slp1         | sleepy homolog Slp1                                           |
| SPAC27F1.08  | Nramp family                                                  |
| SPAC2E1P5.05 | U3 snoRNP-associated protein                                  |
| SPBC14F5.13c | alkaline phosphatase                                          |
| SPBC15D4.01c | kinesin-like protein                                          |
| SPBC17D11.08 | WD repeat protein                                             |
| SPBC215.01   | GTPase activating protein                                     |
| SPBC23E6.01c | RNA-binding protein                                           |
| SPBC3E7.15c  | sphingosine N-acyltransferase                                 |
| SPBC4F6.13c  | WD repeat protein                                             |
| SPBC56F2.04  | snoRNA binding                                                |
| SPBPJ4664.02 | glycoprotein                                                  |
| SPCC18.05c   | notchless-like protein                                        |
| SPCC970.10c  | ubiquitin-protein ligase E3                                   |
| spp2         | DNA primase large subunit Spp2                                |
| srw1         | CDK inhibitor Srw1                                            |
| tea1         | cell end marker Tea1                                          |
| tea3         | cell end marker Tea3                                          |
| zfs1         | transcription factor Zfs1                                     |

**Supporting Table10: Human genes in the CCC3 set.**

| <b>Name</b> | <b>Description</b>                                                    |
|-------------|-----------------------------------------------------------------------|
| ACTA2       | ACTA2, ACTSA, ACTVS: Actin, aortic smooth muscle                      |
| ACTR1A      | ACTR1A, CTRN1: Alpha-centractin                                       |
| ACTR2       |                                                                       |
| ACTR6       | ACTR6, CDA12: Actin-related protein 6                                 |
| ALPP        | ALPP, PLAP: Alkaline phosphatase, placental type precursor            |
| ANKRD17     | KIAA0697, ANKRD17: KIAA0697 protein (Fragment)                        |
| CCNA2       | CCNA2, CCN1, CCNA: Cyclin-A2                                          |
| CCNB1       | Cyclin B1                                                             |
| CCNE1       | CCNE1, CCNE: G1/S-specific cyclin-E1                                  |
| CCNF        | CCNF: G2/mitotic-specific cyclin-F                                    |
| CDC20       | CDC20: Cell division cycle protein 20 homolog                         |
| CDC42       | BB1: Growth-regulating protein BB1                                    |
| CDC6        | CDC6, CDC18L: Cell division control protein 6 homolog                 |
| CENPE       | CENPE variant protein: CENPE variant protein (Fragment)               |
| CENPF       | CENPF: Centromere protein F                                           |
| CKAP5       | CKAP5: CKAP5 protein (Fragment)                                       |
| CSPG6       | CSPG6, BAM, BMH, SMC3, SMC3L1: Structural maintenance of chromosome 3 |
| DRIM        | UTP20, DRIM: Small subunit processome component 20 homolog            |
| ELAVL2      | ELAVL2, RP11-315I14.4-004: ELAV                                       |
| FOXK2       |                                                                       |
| FOXM1       |                                                                       |
| FZR1        | FZR1, CDH1, FYR, FZR, KIAA1242: Fizzy-related protein homolog         |
| GRLF1       | GRLF1, GRF1, KIAA1722: Glucocorticoid receptor DNA-binding factor 1   |
| H3F3A       | NA                                                                    |
| HIST1H2AC   | HIST1H2AC, H2AFL: Histone H2A type 1-C                                |
| HIST1H2BD   | HIST2H2BF: HIST2H2BF protein                                          |
| HIST1H4I    | NA                                                                    |
| HIST2H2AA   | HIST2H2AA3, H2AFO, HIST2H2AA: Histone H2A type 2-A                    |
| HIST2H2BE   |                                                                       |
| IQGAP2      | IQGAP2: Ras GTPase-activating-like protein IQGAP2                     |
| IQGAP3      | IQGAP3: Ras GTPase-activating-like protein IQGAP3                     |
| KIF11       | KIF11, EG5, KNSL1: Kinesin-like protein KIF11                         |
| KIF14       | KIF14, KIAA0042: Kinesin-like protein KIF14                           |
| KIF1A       | KIF1A, ATSV: Kinesin-like protein KIF1A                               |
| KIF1B       | KIF1B, KIAA0591, KIAA1448: Kinesin-like protein KIF1B                 |
| KIF22       | KIF22, KID, KNSL4: Kinesin-like protein KIF22                         |
| KIF23       | KIF23: KIF23 protein (Fragment)                                       |

|         |                                                                                           |
|---------|-------------------------------------------------------------------------------------------|
| KIF2C   | KIF2C, KNSL6: Kinesin-like protein KIF2C                                                  |
| KIF5A   | KIF5A, NKHC1: Kinesin heavy chain isoform 5A                                              |
| KIF5B   |                                                                                           |
| KIF9    | KIF9: Kinesin-like protein KIF9                                                           |
| KIFC1   | KIFC1, HSET, KNSL2: Kinesin-like protein KIFC1                                            |
| KIFC3   | KIFC3: Kinesin-like protein KIFC3                                                         |
| KLF13   | KLF13, BTEB3, NSLP1: Krueppel-like factor 13                                              |
| LASS6   | LASS6: LASS6 protein                                                                      |
| MCM2    | MCM2, BM28, CDCL1, KIAA0030: DNA replication licensing factor MCM2                        |
| MCM3    | MCM3, RP1-108C2.3-004: MCM3 minichromosome maintenance deficient 3 (Fragment)             |
| MCM4    | MCM4, CDC21: DNA replication licensing factor MCM4                                        |
| MCM5    | Minichromosome maintenance deficient protein 5 variant (Fragment)                         |
| MCM6    | MCM6: DNA replication licensing factor MCM6                                               |
| MCM8    | MCM8, C20orf154: DNA replication licensing factor MCM8                                    |
| MDC1    | MDC1, KIAA0170, NFB1: Mediator of DNA damage checkpoint protein 1                         |
| MOBK2C  | MOBK2C, RP11-49P4.4-002: MOB1, Mps One Binder kinase activator-like 2C                    |
| MSH2    | MSH2: DNA mismatch repair protein Msh2                                                    |
| MSH5    | MSH5, XXbac-BCX40G17.5-008, XXbac-BPG32J3.7-008: MutS homolog 5 (Fragment)                |
| ORC1L   | ORC1L, ORC1, PARC1: Origin recognition complex subunit 1                                  |
| PCBP2   | PCBP2: PCBP2 protein                                                                      |
| PKMYT1  | PKMYT1, MYT1: Membrane-associated tyrosine- and threonine-specific cdc2-inhibitory kinase |
| POLE    | DNA polymerase epsilon catalytic subunit variant (Fragment)                               |
| PRC1    | PRC1: Protein regulator of cytokinesis 1                                                  |
| PRIM2A  | PREDICTED: similar to DNA primase large subunit, 58kDa                                    |
| PSTPIP1 | PSTPIP1, CD2BP1: Proline-serine-threonine phosphatase-interacting protein 1               |
| RABEPK  | p40: P40                                                                                  |
| RAD51   | CDNA FLJ16262 fis, clone IMR322008651, highly similar to DNA REPAIR PROTEIN RAD51         |
| RHOB    | RHOB, ARH6, ARHB: Rho-related GTP-binding protein RhoB precursor                          |
| RHOH    | RHOH, ARHH, TTF: Rho-related GTP-binding protein RhoH                                     |
| RNPC3   | RNP, RNPC3, RP5-1108M17.6-002: CDNA FLJ25070 fis, clone CBL05164                          |
| RNU3IP2 | RNU3IP2, U355K: U3 small nucleolar RNA-interacting protein 2                              |
| RRM1    | RRM1, RR1: Ribonucleoside-diphosphate reductase large subunit                             |
| SCC-112 | KIAA0648: KIAA0648 protein (Fragment)                                                     |
| SLC11A2 | SLC11A2: Divalent metal transporter (Fragment)                                            |
| SMC4L1  | SMC4L1, CAPC, SMC4: Structural maintenance of chromosomes 4-like 1 protein                |
| TLE3    | TLE3, KIAA1547: Transducin-like enhancer protein 3                                        |
| TUBA1   |                                                                                           |
| TUBA2   | TUBA2: Tubulin alpha-2 chain                                                              |

|         |                                                                 |
|---------|-----------------------------------------------------------------|
| TUBA3   | TUBA3: Tubulin alpha-3 chain                                    |
| TUBG1   | TUBG1, TUBG: Tubulin gamma-1 chain                              |
| USP6NL  | USP6NL, KIAA0019: USP6 N-terminal-like protein                  |
| WDR68   | WDR68, HAN11: WD repeat protein 68                              |
| WDTC1   | RP11-4K3__A.1, RP11-4K3__A.1-003: Novel protein                 |
| WSB1    | WSB1, SWIP1: WD repeat and SOCS box-containing protein 1        |
| XRCC3   | XRCC3: DNA-repair protein XRCC3                                 |
| ZFP36L1 | ZFP36L1, BERG36, BRF1, ERF1, TIS11B: Butyrate response factor 1 |

**Supporting Table 11:** Percentage of input promoter datasets matching appropriate Harbison motif

| <i>Dataset</i> | <i>Fission</i>            |                       | <i>Budding</i>              |                       |
|----------------|---------------------------|-----------------------|-----------------------------|-----------------------|
|                | <i>Fission Cell Cycle</i> | <i>Non-Cell Cycle</i> | <i>Cell Cycle Conserved</i> | <i>Cell Cycle All</i> |
| SWI4           | 29.73%                    | 26.06%                | 60.71%                      | 55.56%                |
| SWI6           | 51.43%                    | 30.46%                | 60%                         | 50.54%                |
| MBP1           | 52.27%                    | 16.57%                | 51.72%                      | 45.98%                |
| FKH1           | 21.95%                    | 25%                   | 52.38%                      | 36.23%                |
| FKH2           | 32.5%                     | 13.43%                | 39.13%                      | 40%                   |
| NDD1           | 17.65%                    | 31.48%                | 50%                         | 44.9%                 |
| MCM1           | 26.92%                    | 15.38%                | 73.33%                      | 69.05%                |
| ACE2           | 28.57%                    | 29.63%                | 33.33%                      | 48.48%                |
| SWI5           | 50%                       | 44.44%                | 25%                         | 38%                   |
| YOX1           | 25%                       | 12.5%                 | 42.86%                      | 57.14%                |
| YHP1           | 0%                        | 0%                    | 50%                         | 33.33%                |

**Supporting Table 11:** All promoters were scanned using the appropriate Harbison motifs. In order to set a threshold, 10Mbp of random sequence was generated using the same GC-content as budding or fission yeast. Next we set a threshold for each motif as that which gives a false discovery rate (FDR) of 0.0001 in these random datasets. As can be seen from the table, for a number of factors in G1/S and for Fkh2 the conserved cycling fission yeast genes contained substantially more motifs than the negative control set. The percentage of these motifs for the cycling fission yeast genes was similar to the percentage in the budding yeast sets indicating that their activity is highly conserved between the two species. See supporting Methods for more details.

**Supporting Table 12. Enriched budding yeast complexes (Krogan *et al.* [18])**

| complex id | pval     | genes in CCC4 | genes in CCC3 | complex subunits                                                                                                                                                                                                                             |
|------------|----------|---------------|---------------|----------------------------------------------------------------------------------------------------------------------------------------------------------------------------------------------------------------------------------------------|
| 54         | 0.000019 | 3             | 0             | ATE1, SIC1, CKS1, <b>CLB5</b> , YLR187W, <b>CLB4</b> , CLB3, CDC28, <b>CLB2</b>                                                                                                                                                              |
| 15         | 0.006971 | 2             | 4             | NUP188, PSY2, <b>HTB2</b> , ARG82, HEX3, TOP2, YDL156W, YBL046W, STP1, <b>HHF2</b> , <b>HTB1</b> , SPT5, CKI1, <b>HHF1</b> , ABF2, RRD1, <b>HTA2</b> , SLX8, PPH3, <b>HTA1</b>                                                               |
| 3          | 0.018395 | 2             | 0             | SCL1, PRE6, PRE2, YJL132W, <b>MCM6</b> , PRE5, YKR070W, UMP1, DCG1, SNQ2, TOS8, YDL203C, PRE7, MLP1, PRE10, PMD1, PMT4, SGA1, PRE4, PRE1, GNA1, PUP1, YLR290C, PRE3, PRE8, <b>CIN8</b> , PUP2, YLR211C, YDR179W-A, PUP3, PRE9, RFT1, YCR076C |
| 251        | 0.01898  | 1             | 0             | SKO1, <b>HHT1</b> , VAC7                                                                                                                                                                                                                     |
| 285        | 0.01898  | 1             | 0             | SPC97, <b>TUB4</b> , SPC72                                                                                                                                                                                                                   |
| 303        | 0.01898  | 1             | 0             | <b>STU2</b> , TUB3, TUB1                                                                                                                                                                                                                     |
| 346        | 0.01898  | 1             | 0             | <b>CDC6</b> , HSF1, YLR419W                                                                                                                                                                                                                  |
| 349        | 0.01898  | 1             | 0             | PRP22, <b>KIP1</b> , SOK2                                                                                                                                                                                                                    |
| 176        | 0.025229 | 1             | 0             | <b>SMC3</b> , SMC1, IRR1, MCD1                                                                                                                                                                                                               |
| 182        | 0.025229 | 1             | 0             | GIC1, YIL067C, <b>FIG2</b> , MRP13                                                                                                                                                                                                           |
| 86         | 0.043743 | 1             | 0             | YPL183C, YSC85, CUE5, YMR259C, TRM7, YSC84, <b>CLB1</b>                                                                                                                                                                                      |
| 64         | 0.049838 | 1             | 1             | <b>POL2</b> , <b>MCM2</b> , INM1, DPB4, DPB3, MBA1, DPB2, RPN4                                                                                                                                                                               |

|     |          |   |   |                                                                               |
|-----|----------|---|---|-------------------------------------------------------------------------------|
| 412 | 0.000035 | 0 | 2 | <b>MSH6</b> , <b>MSH2</b>                                                     |
| 199 | 0.00021  | 0 | 2 | RNR4, <b>RNR1</b> , RNR2, <b>RNR3</b>                                         |
| 138 | 0.000348 | 0 | 2 | SWP1, <b>ACE2</b> , YIL108W, YNL254C, <b>FKH2</b>                             |
| 50  | 0.006387 | 1 | 1 | <b>ORC1</b> , ORC2, <b>SWE1</b> , HAT2, YJR154W, ORC6, HAT1, ORC5, ORC3, ORC4 |
| 546 | 0.012009 | 0 | 1 | <b>RAD51</b> , RAD52                                                          |
| 255 | 0.017961 | 0 | 1 | YLR089C, <b>YPL247C</b> , HSP60                                               |

|     |          |   |   |                                                                 |
|-----|----------|---|---|-----------------------------------------------------------------|
| 231 | 0.023877 | 0 | 1 | YER184C, KIP2, <b>KEL2</b> , KEL1                               |
| 131 | 0.02976  | 0 | 1 | RCL1, BPL1, BMS1, RNT1, <b>SMF3</b>                             |
| 144 | 0.02976  | 0 | 1 | <b>ASE1</b> , STM1, YPL150W, RPS25B, VTS1                       |
| 98  | 0.035608 | 0 | 1 | VPS25, VPS36, <b>HCMI</b> , YBR025C, SNF8, ADH7                 |
| 69  | 0.047201 | 0 | 1 | YJL192C, MSS1, YTM1, YGR067C, <b>PDS5</b> , YML059C, NOP7, STP3 |

**Supporting Table 13: GO enrichment comparison for budding yeast; Categories that are significant in both conserved and full sets**

| Intersection of top 20 enriched GO terms               | pval for CCC3 | pval for CCC3 (corrected) | pval for general set | pval for general set (corrected) |
|--------------------------------------------------------|---------------|---------------------------|----------------------|----------------------------------|
| mitotic cell cycle                                     | 5.60E-18      | 0.001                     | 7.20E-17             | 0.001                            |
| cell cycle                                             | 3.10E-15      | 0.001                     | 1.10E-12             | 0.001                            |
| DNA metabolism                                         | 5.60E-15      | 0.001                     | 1.80E-09             | 0.001                            |
| DNA replication                                        | 2.00E-13      | 0.001                     | 1.20E-13             | 0.001                            |
| DNA-dependent DNA replication                          | 2.70E-12      | 0.001                     | 7.20E-10             | 0.001                            |
| microtubule-based process                              | 7.40E-10      | 0.001                     | 1.40E-15             | 0.001                            |
| microtubule cytoskeleton organization and biogenesis   | 1.70E-09      | 0.001                     | 2.00E-12             | 0.001                            |
| regulation of cyclin-dependent protein kinase activity | 2.50E-09      | 0.001                     | 1.20E-07             | 0.001                            |
| DNA unwinding during replication                       | 2.50E-09      | 0.001                     | 1.20E-07             | 0.001                            |

Supporting Table 13. GO enrichment comparison between conserved set and the whole set of cycling genes in budding yeast

**Supporting Table 14: GO enrichment comparison for budding yeast; Categories that are more significant in conserved set**

| Top 20 enriched GO terms for CCC3 but not for the general set | pval for CCC3 | pval for CCC3 (corrected) | pval for general set | pval for general set (corrected) |
|---------------------------------------------------------------|---------------|---------------------------|----------------------|----------------------------------|
| chromatin assembly or disassembly                             | 2.60E-12      | 0.001                     | 6.50E-06             | 0.001                            |
| organelle organization and biogenesis                         | 7.30E-12      | 0.001                     | 0.33                 | 1                                |
| pre-replicative complex formation and maintenance             | 5.40E-11      | 0.001                     | 8.40E-05             | 0.022                            |
| DNA packaging                                                 | 6.70E-10      | 0.001                     | 0.03                 | 0.998                            |
| establishment and/or maintenance of chromatin architecture    | 6.70E-10      | 0.001                     | 0.03                 | 0.998                            |
| cellular physiological process                                | 1.30E-09      | 0.001                     | 0.23                 | 1                                |
| DNA replication initiation                                    | 1.80E-09      | 0.001                     | 1.30E-05             | 0.002                            |
| DNA geometric change                                          | 2.50E-09      | 0.001                     | 1.20E-07             | 0.001                            |
| cytoskeleton organization and biogenesis                      | 2.90E-09      | 0.001                     | 2.50E-07             | 0.001                            |
| interphase                                                    | 4.40E-09      | 0.001                     | 1.10E-05             | 0.001                            |
| interphase of mitotic cell cycle                              | 4.40E-09      | 0.001                     | 1.10E-05             | 0.001                            |

Supporting Table 14. GO enrichment comparison between conserved set and the whole set of cycling genes in budding yeast

**Supporting Table 15: GO enrichment comparison for budding yeast; Categories that are more significant in full set**

| Top 20 enriched GO terms for the general set but not for CCC3 | pval for CCC3 | pval for CCC3 (corrected) | pval for general set | pval for general set (corrected) |
|---------------------------------------------------------------|---------------|---------------------------|----------------------|----------------------------------|
| mitotic sister chromatid cohesion                             |               |                           | 4.70E-09             | 0.001                            |
| mitotic sister chromatid segregation                          | 3.70E-06      | 0.001                     | 6.60E-09             | 0.001                            |
| sister chromatid segregation                                  | 4.20E-06      | 0.001                     | 1.10E-08             | 0.001                            |
| mitotic spindle organization and biogenesis in nucleus        | 3.40E-06      | 0.001                     | 1.40E-08             | 0.001                            |
| M phase                                                       | 1.80E-08      | 0.001                     | 6.10E-08             | 0.001                            |
| conjugation with cellular fusion                              | 0.0019        | 0.124                     | 8.20E-08             | 0.001                            |
| sexual reproduction                                           | 0.0019        | 0.124                     | 8.20E-08             | 0.001                            |
| conjugation                                                   | 0.0019        | 0.124                     | 8.20E-08             | 0.001                            |

Supporting Table 15. GO enrichment comparison between conserved set and the whole set of cycling genes in budding yeast

**Supporting Table 16: GO enrichment comparison for fission yeast; Categories that are significant in both conserved and full sets**

| Intersection of top 20 enriched GO terms | pval for CCC3 | pval for CCC3 (corrected) | pval for general set | pval for general set (corrected) |
|------------------------------------------|---------------|---------------------------|----------------------|----------------------------------|
| organelle organization and biogenesis    | 6.40E-16      | 0.001                     | 1.70E-06             | 0.001                            |
| mitotic cell cycle                       | 1.60E-13      | 0.001                     | 2.60E-11             | 0.001                            |
| cell organization and biogenesis         | 3.50E-10      | 0.001                     | 2.90E-07             | 0.001                            |
| cell division                            | 8.00E-10      | 0.001                     | 4.80E-07             | 0.001                            |
| cytokinesis                              | 8.00E-10      | 0.001                     | 4.80E-07             | 0.001                            |
| interphase of mitotic cell cycle         | 2.30E-09      | 0.001                     | 5.30E-08             | 0.001                            |
| interphase                               | 2.90E-09      | 0.001                     | 8.70E-08             | 0.001                            |

Supporting Table 16. GO enrichment comparison between conserved set and the whole set of cycling genes in fission yeast

**Supporting Table 17: GO enrichment comparison for fission yeast; Categories that are more significant in conserved set**

| Top 20 enriched GO terms for CCC3 but not for the general set | pval for CCC3 | pval for CCC3 (corrected) | pval for general set | pval for general set (corrected) |
|---------------------------------------------------------------|---------------|---------------------------|----------------------|----------------------------------|
| cytoskeleton organization and biogenesis                      | 3.10E-11      | 0.001                     | 0.0059               | 0.728                            |
| nucleosome assembly                                           | 3.40E-11      | 0.001                     | 0.00066              | 0.17                             |
| DNA metabolism                                                | 9.90E-10      | 0.001                     | 0.02                 | 0.982                            |
| microtubule-based process                                     | 1.00E-09      | 0.001                     | 0.01                 | 0.916                            |
| chromatin assembly or disassembly                             | 1.20E-09      | 0.001                     | 0.01                 | 0.928                            |
| cell cycle                                                    | 1.30E-09      | 0.001                     | 9.30E-05             | 0.012                            |
| microtubule-based movement                                    | 1.50E-09      | 0.001                     | 8.00E-04             | 0.186                            |
| cytoskeleton-dependent intracellular transport                | 2.10E-09      | 0.001                     | 0.0011               | 0.276                            |
| regulation of cellular process                                | 7.90E-09      | 0.001                     | 0.0016               | 0.364                            |
| regulation of cellular physiological process                  | 1.90E-08      | 0.001                     | 0.0012               | 0.29                             |
| chromosome organization and biogenesis                        | 2.10E-08      | 0.001                     | 0.01                 | 0.902                            |
| regulation of physiological process                           | 2.20E-08      | 0.001                     | 0.0011               | 0.274                            |
| protein complex assembly                                      | 2.60E-08      | 0.001                     | 0.13                 | 1                                |

Supporting Table 17. GO enrichment comparison between conserved set and the whole set of cycling genes in fission yeast

**Supporting Table 18: GO enrichment comparison for fission yeast; Categories that are more significant in full set**

| Top 20 enriched GO terms for the general set but not for CCC3 | pval for CCC3 | pval for CCC3 (corrected) | pval for general set | pval for general set (corrected) |
|---------------------------------------------------------------|---------------|---------------------------|----------------------|----------------------------------|
| M phase of mitotic cell cycle                                 | 1.50E-05      | 0.002                     | 6.10E-08             | 0.001                            |
| mitosis                                                       | 0.00016       | 0.012                     | 3.60E-07             | 0.001                            |
| cytoplasm organization and biogenesis                         |               |                           | 3.00E-06             | 0.001                            |
| ribosome biogenesis and assembly                              |               |                           | 3.00E-06             | 0.001                            |
| ribosome biogenesis                                           |               |                           | 3.50E-06             | 0.001                            |
| cell wall organization and biogenesis                         |               |                           | 3.50E-06             | 0.001                            |
| external encapsulating structure organization and biogenesis  |               |                           | 3.50E-06             | 0.001                            |
| cellular polysaccharide metabolism                            |               |                           | 5.60E-06             | 0.001                            |
| polysaccharide metabolism                                     |               |                           | 7.60E-06             | 0.001                            |
| DNA replication initiation                                    | 1.80E-06      | 0.001                     | 8.30E-06             | 0.001                            |
| cell wall biosynthesis (sensu Fungi)                          |               |                           | 1.20E-05             | 0.002                            |
| biopolymer biosynthesis                                       |               |                           | 1.50E-05             | 0.002                            |
| polysaccharide biosynthesis                                   |               |                           | 1.50E-05             | 0.002                            |

Supporting Table 18. GO enrichment comparison between conserved set and the whole set of cycling genes in fission yeast

**Supporting Table 19: GO enrichment comparison for human genes; Categories that are significant in both conserved and full sets**

| Intersection of top 20 enriched GO terms             | pval for CCC3 | pval for CCC3 (corrected) | pval for general set | pval for general set (corrected) |
|------------------------------------------------------|---------------|---------------------------|----------------------|----------------------------------|
| microtubule-based movement                           | 1.80E-25      | 0.001                     | 2.70E-07             | 0.001                            |
| cytoskeleton-dependent intracellular transport       | 2.10E-23      | 0.001                     | 1.20E-05             | 0.01                             |
| microtubule-based process                            | 4.30E-22      | 0.001                     | 7.10E-09             | 0.001                            |
| cell cycle                                           | 4.60E-17      | 0.001                     | 9.30E-12             | 0.001                            |
| DNA-dependent DNA replication                        | 1.60E-15      | 0.001                     | 2.70E-08             | 0.001                            |
| organelle organization and biogenesis                | 7.20E-15      | 0.001                     | 6.50E-05             | 0.028                            |
| mitotic cell cycle                                   | 8.00E-15      | 0.001                     | 1.40E-11             | 0.001                            |
| DNA replication                                      | 6.60E-14      | 0.001                     | 7.10E-08             | 0.001                            |
| M phase                                              | 1.80E-13      | 0.001                     | 4.10E-10             | 0.001                            |
| mitosis                                              | 4.90E-12      | 0.001                     | 3.80E-10             | 0.001                            |
| M phase of mitotic cell cycle                        | 5.70E-12      | 0.001                     | 5.30E-10             | 0.001                            |
| DNA metabolism                                       | 5.70E-12      | 0.001                     | 1.10E-06             | 0.002                            |
| cell division                                        | 1.80E-09      | 0.001                     | 7.50E-07             | 0.001                            |
| microtubule cytoskeleton organization and biogenesis | 1.90E-06      | 0.001                     | 7.70E-05             | 0.03                             |

Supporting Table 19. GO enrichment comparison between conserved set and the whole set of cycling genes in humans

**Supporting Table 20: GO enrichment comparison for human genes; Categories that are more significant in conserved set**

| Top 20 enriched GO terms for CCC3 but not for the general set | pval for CCC3 | pval for CCC3 (corrected) | pval for general set | pval for general set (corrected) |
|---------------------------------------------------------------|---------------|---------------------------|----------------------|----------------------------------|
| cytoskeleton organization and biogenesis                      | 1.70E-14      | 0.001                     | 0.00028              | 0.108                            |
| DNA replication initiation                                    | 5.90E-13      | 0.001                     | 0.00018              | 0.074                            |
| establishment of cellular localization                        | 3.80E-10      | 0.001                     | 0.03                 | 0.992                            |
| cellular localization                                         | 4.90E-10      | 0.001                     | 0.03                 | 0.994                            |
| cell organization and biogenesis                              | 1.80E-09      | 0.001                     | 0.0019               | 0.404                            |
| intracellular transport                                       | 2.20E-09      | 0.001                     | 0.08                 | 1                                |

Supporting Table 20. GO enrichment comparison between conserved set and the whole set of cycling genes in humans

**Supporting Table 21: GO enrichment comparison for human genes; Categories that are more significant in the full set**

| Top 20 enriched GO terms for the general set but not for CCC3 | pval for CCC3 | pval for CCC3 (corrected) | pval for general set | pval for general set (corrected) |
|---------------------------------------------------------------|---------------|---------------------------|----------------------|----------------------------------|
| spindle organization and biogenesis                           |               |                           | 2.30E-08             | 0.001                            |
| chromosome segregation                                        |               |                           | 9.00E-08             | 0.001                            |
| regulation of progression through cell cycle                  | 3.10E-06      | 0.001                     | 1.40E-07             | 0.001                            |
| regulation of cell cycle                                      | 3.20E-06      | 0.001                     | 1.70E-07             | 0.001                            |
| mitotic spindle organization and biogenesis                   |               |                           | 9.30E-07             | 0.002                            |
| DNA repair                                                    | 0.00059       | 0.058                     | 7.30E-05             | 0.028                            |

Supporting Table 21. GO enrichment comparison between conserved set and the whole set of cycling genes in human
